# Supplementary material for: tRNA derived fragment (tRF)-3009 participates in modulation of IFN-α-induced CD4+ T cell oxidative phosphorylation in lupus patients
Source: J Transl Med. 2021 Jul 13;19:305. doi: 10.1186/s12967-021-02967-3 (PMC8278670; doi:10.1186/s12967-021-02967-3)
Supplement: Supplementary file 10 — Additional file 10: Table S5. The KEGG analysis of differentially expressed genes in the ‘systemic lupus erythematosus pathway’. [file 12967_2021_2967_MOESM10_ESM.xlsx]

## Sheet: Sheet1
Supplementary Table 5. The KEGG analysis of differentially expressed genes in the ‘systemic lupus erythematosus pathway’
PathwayID	PathwayTerm	QueryID	Symbol	Description	P-Value	FDR	Enrichment
PATH:05322	Systemic lupus erythematosus	HIST1H3H	HIST1H3H	histone cluster 1, H3h	0.00180946	0.0351337	2.33312
PATH:05322	Systemic lupus erythematosus	CD86	CD86	CD86 molecule	0.00180946	0.0351337	2.33312
PATH:05322	Systemic lupus erythematosus	HIST3H2A	HIST3H2A	histone cluster 3, H2a	0.00180946	0.0351337	2.33312
PATH:05322	Systemic lupus erythematosus	FCGR3A	FCGR3A	Fc fragment of IgG, low affinity IIIa, receptor (CD16a)	0.00180946	0.0351337	2.33312
PATH:05322	Systemic lupus erythematosus	IL10	IL10	interleukin 10	0.00180946	0.0351337	2.33312
PATH:05322	Systemic lupus erythematosus	HIST1H2BC	HIST1H2BC	histone cluster 1, H2bc	0.00180946	0.0351337	2.33312
PATH:05322	Systemic lupus erythematosus	CD80	CD80	CD80 molecule	0.00180946	0.0351337	2.33312
PATH:05322	Systemic lupus erythematosus	HIST1H2BD	HIST1H2BD	histone cluster 1, H2bd	0.00180946	0.0351337	2.33312
PATH:05322	Systemic lupus erythematosus	HIST2H2BF	HIST2H2BF	histone cluster 2, H2bf	0.00180946	0.0351337	2.33312
PATH:05322	Systemic lupus erythematosus	H3F3B	H3F3B	H3 histone, family 3B (H3.3B)	0.00180946	0.0351337	2.33312
PATH:05322	Systemic lupus erythematosus	HIST1H2BK	HIST1H2BK	histone cluster 1, H2bk	0.00180946	0.0351337	2.33312
PATH:05322	Systemic lupus erythematosus	TRIM21	TRIM21	tripartite motif containing 21	0.00180946	0.0351337	2.33312
PATH:05322	Systemic lupus erythematosus	HIST2H2BE	HIST2H2BE	histone cluster 2, H2be	0.00180946	0.0351337	2.33312
PATH:05322	Systemic lupus erythematosus	SSB	SSB	Sjogren syndrome antigen B (autoantigen La)	0.00180946	0.0351337	2.33312
PATH:05322	Systemic lupus erythematosus	HIST1H2AC	HIST1H2AC	histone cluster 1, H2ac	0.00180946	0.0351337	2.33312
